# Supplementary material for: Duodenal infusion of soy protein hydrolysate activates cAMP signaling and hypothalamic neurotransmitter synthesis in pigs
Source: Royal Society of Chemistry journal article supplement (doi:10.1039/d2fo02314h), 2022-01-01
Supplement: d2fo02314h1.pdf [file d2fo02314h1.pdf]

**Table S1.** Dietary composition and nutritional component (air-dry basis).

| Items                       | Composition, % |
|-----------------------------|----------------|
| Ingredients                 |                |
| Corn                        | 59.81          |
| Soya bean meal              | 25.80          |
| Wheat flour                 | 5.00           |
| Rice bran meal              | 3.00           |
| Corn germ meal              | 3.00           |
| L-Lysine, 98.5 %            | 0.11           |
| DL-Methionine, 99.0 %       | 0.04           |
| L-Threonine, 99.0 %         | 0.04           |
| L-Tryptophan, 99.0 %        | 0.01           |
| Calcium hydrogen phosphate  | 0.40           |
| Limestone                   | 1.00           |
| NaCl                        | 0.50           |
| Acidifying agent            | 0.40           |
| Zinc oxide                  | 0.20           |
| Choline chloride            | 0.10           |
| Mould inhibitor             | 0.05           |
| Phytase                     | 0.02           |
| Compound enzyme             | 0.02           |
| Mineral premix <sup>a</sup> | 0.50           |
| Nutrition level, %          |                |
| NE, MJ/Kg                   | 10.19          |
| Crude protein               | 18.00          |
| Crude fat                   | 2.63           |
| Crude fiber                 | 3.79           |
| Crude ash                   | 5.03           |
| Lysine                      | 1.10           |

|            |      |
|------------|------|
| Methionine | 0.34 |
| Tryptophan | 0.21 |
| Threonine  | 0.75 |
| Valine     | 0.87 |

---

<sup>a</sup>Premix supplied the following per kg complete diet: vitamin A, 3,800 IU; vitamin D<sub>3</sub>, 800 IU; vitamin E, 9 mg; vitamin B<sub>1</sub>, 1 mg; vitamin K<sub>3</sub>, 1 mg; vitamin B<sub>2</sub>, 2 mg; vitamin B<sub>6</sub>, 1.2 mg; vitamin B<sub>12</sub>, 10 µg; nicotinic acid, 10 mg; biotin, 50 µg; folic acid, 0.4 mg; iron (as FeSO<sub>4</sub> · H<sub>2</sub>O), 80 mg; zinc, 80 mg; iodine (as KI), 0.14 mg; Se (as Na<sub>2</sub>SeO<sub>3</sub>), 0.25 mg; copper as (CuSO<sub>4</sub> · 5H<sub>2</sub>O), 5 mg; and Mn (as MnSO<sub>4</sub> · H<sub>2</sub>O), 3 mg.
