# Supplementary material for: Duodenal infusion of soy protein hydrolysate activates cAMP signaling and hypothalamic neurotransmitter synthesis in pigs
Source: Royal Society of Chemistry journal article supplement (doi:10.1039/d2fo02314h), 2022-01-01
Supplement: d2fo02314h2.pdf [file d2fo02314h2.pdf]

**Table S2.** Growth performance in the saline and SPH groups.

| Items                            | Saline      | SPH         | <i>P</i> -value |
|----------------------------------|-------------|-------------|-----------------|
| Average daily feed intake (kg/d) | 1.73 ± 0.07 | 1.61 ± 0.07 | 0.236           |
| Average daily gain (kg)          | 0.87 ± 0.04 | 0.75 ± 0.06 | 0.095           |
| Feed conversion ratio            | 2.06 ± 0.10 | 2.13 ± 0.18 | 0.737           |

SPH, soy protein hydrolysate. Values are mean ± SEM (n = 8). *P* < 0.05 implies statistically significant.
